# Supplementary material
Source: PubMed Central journal article supplement (PMC3590091)
Supplement: supp_2011.061127_2011.061127.HOSOKAWA_SUPPL.pdf [file supp_2011.061127_2011.061127.HOSOKAWA_SUPPL.pdf]

## Favorable outcome of patients who have 13q deletion: a suggestion for revision of the WHO 'MDS-U' designation

Kohei Hosokawa,<sup>1</sup> Takamasa Katagiri,<sup>1,2</sup> Naomi Sugimori,<sup>1</sup> Ken Ishiyama,<sup>1,3</sup> Yumi Sasaki,<sup>1</sup> Yu Seiki,<sup>1</sup> Aiko Sato-Otsubo,<sup>4</sup> Masashi Sanada,<sup>4</sup> Seishi Ogawa,<sup>4</sup> and Shinji Nakao<sup>1</sup>

<sup>1</sup>Cellular Transplantation Biology, Kanazawa University Graduate School of Medical Science, Kanazawa; <sup>2</sup>Clinical Laboratory Science, Kanazawa University Graduate School of Medical Science, Kanazawa; <sup>3</sup>Tokyo Metropolitan Ohtsuka Hospital, Department of Internal Medicine, Toshima; and <sup>4</sup>Cancer Genomics Project, Graduate School of Medicine, University of Tokyo, Tokyo, Japan

Citation: Hosokawa K, Katagiri T, Sugimori N, Ishiyama K, Sasaki Y, Seiki Y, Sato-Otsubo A, Sanada M, Ogawa S, and Nakao S. Favorable outcome of patients who have 13q deletion: a suggestion for revision of the WHO 'MDS-U' designation. *Haematologica* 2012;97(12):1845-1849. doi:10.3324/haematol.2011.061127

Online Supplementary Table S1. Antibodies used in flow cytometry.

| Surface antigen | Isotype | Fluorescein | Source          |
|-----------------|---------|-------------|-----------------|
| CD55            | IgG2a   | FITC        | BD Pharmingen   |
| CD59            | IgG2a   | FITC        | Beckman Coulter |
| CD11b           | IgG1    | PE          | BD Pharmingen   |
| glycophorin A   | IgG1    | PE          | Dako            |

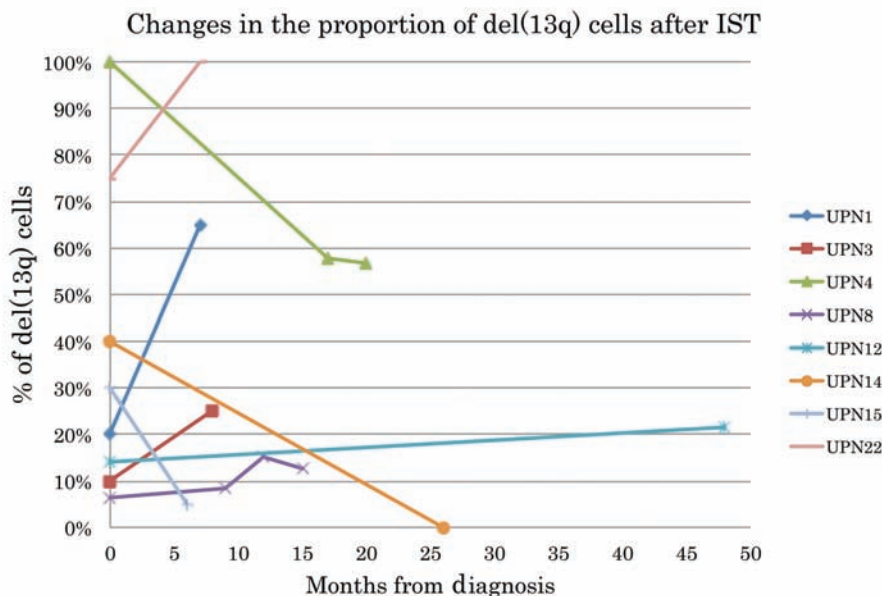

Online Supplementary Figure S1. Eight patients (UPN1,3,4,8,12,14,15,22) were treated with IST and changes in the proportion of del(13q) cells were available. The percentage of del(13q) clones revealed by G-banding increased in 5 patients (UPN1,3,8(FISH),12,22) and decreased in 3 (UPN4,14,15) after successful IST.
