# Supplementary material
Source: PubMed Central journal article supplement (PMC3590091)
Supplement: supp_2011.061127_2011_061127-Contributions.pdf [file supp_2011.061127_2011_061127-Contributions.pdf]

**Manuscript no. HAEMATOL/2011/061127 entitled “Favorable outcome of patients who have 13q deletion: a suggestion for revision of the WHO 'MDS-U' designation”**

**Authors: Kohei Hosokawa, Takamasa Katagiri, Naomi Sugimori, Ken Ishiyama, Yumi Sasaki, Yu Seiki, Aiko Sato-Otsubo, Masashi Sanada, Seishi Ogawa, and Shinji Nakao**

**Information about the contributions of each person named as having participated in the study**

**1) Guarantor(s)**, i.e., person(s) who is (are) responsible for the integrity of the work as a whole:  
• Shinji Nakao, Cellular Transplantation Biology, Kanazawa University Graduate School of Medical Science, snakao8205@staff.kanazawa-u.ac.jp

According to the International Committee of Medical Journal Editors (ICMJE) ([http://www.icmje.org/ethical\\_1author.html](http://www.icmje.org/ethical_1author.html)): “Authorship credit should be based on: 1) substantial contributions to conception and design, acquisition of data, or analysis and interpretation of data; 2) drafting the article or revising it critically for important intellectual content; and 3) final approval of the version to be published. Authors should meet conditions 1, 2, and 3 ..... Acquisition of funding, collection of data, or general supervision of the research group alone does not constitute authorship”.

The guarantors of this manuscript confirm that all persons designated as authors qualify for authorship, and that each author has participated sufficiently in the work to take public responsibility for appropriate portions of the content.

2) Authors who participated in the **conception of the study**: Kohei Hosokawa, Shinji Nakao

3) **Design & Methods**. The following authors were responsible for specific investigations (please detail):

- Aiko Sato-Otsubo, Yumi Sasaki were responsible for genomic profiling experiments.
- Masashi Sanada, Seichi Ogawa were responsible for SNP array profiling.
- Kohei Hosokawa was responsible for statistical analysis.
- Yu Seiki, Naomi Sugimori were responsible for patient samples and data.
- Kohei Hosokawa , Takamasa Katagiri were responsible for Flow cytometry and Cell sorting.

4) **Results**. The following authors were responsible for specific portions of the results, including figures and tables (please indicate the person responsible for each figure and each table):

- Kohei Hosokawa, Yu Seiki, Naomi Sugimori were responsible for table1.
- Kohei Hosokawa, Yumi Sasaki, Aiko Sato-Otsubo, Masashi Sanada and Seichi Ogawa were responsible for Figure1.
- Kohei Hosokawa, Yu Seiki, Naomi Sugimori were responsible for Online Supplementary Figure1.
- Kohei Hosokawa, Takamasa Katagiri were responsible for Supplementary table1.

5) **Writing the manuscript**. The following authors were responsible for writing the manuscript:

- Kohei Hosokawa, Takamasa Katagiri, Ken Ishiyama and Shinji Nakao were responsible for writing the manuscript.

6) **Contributors Listed in Acknowledgments**:

The authors would like to thank Rie Ohmi and Kenichi Takemoto for excellent technical assistance, and Yasuhiko Yamamoto for excellent cell sorting technical support. We also thank the doctors who contributed patients to this study:

Mitsufumi Nishio, Ryosuke Yamamura, Yoshiko Okikawa, Takeaki Tomoyose, Takuya Machida, Hiroshi Kanashima, Masahiro Manabe, Yuki Yoshi Moriuchi, Takashi Nakaike, Yutaka Imamura, Kenji Shinohara, Taro Masunari, Akio Maeda, Hirokazu Okumura, Kazuyuki Shigeno, Masayuki Kikukawa, Hidemi Ogura, Tadashi Nagai, Hidetaka Niitsu and Senji Kasahara.
